# Supplementary material for: A new coumarin-based chromogenic chemosensor for the detection of dual analytes Al3+ and F−
Source: Royal Society of Chemistry journal article supplement (doi:10.1039/c4ra11913d), 2014-01-01
Supplement: c4ra11913d1.pdf [file c4ra11913d1.pdf]

## Supporting Information

### **A new coumarin-based chromogenic chemosensor for the detection of dual analytes $\text{Al}^{3+}$ and $\text{F}^-$**

Gyeong Jin Park, Hyun Yong Jo, Ka Young Ryu, Cheal Kim\*

<sup>a</sup>Department of Fine Chemistry and Department of Interdisciplinary Bio IT Materials, Seoul National University of Science and Technology, Seoul 139-743, Korea. Fax: +82-2-973-9149; Tel: +82-2-970-6693; E-mail: [chealkim@seoultech.ac.kr](mailto:chealkim@seoultech.ac.kr)

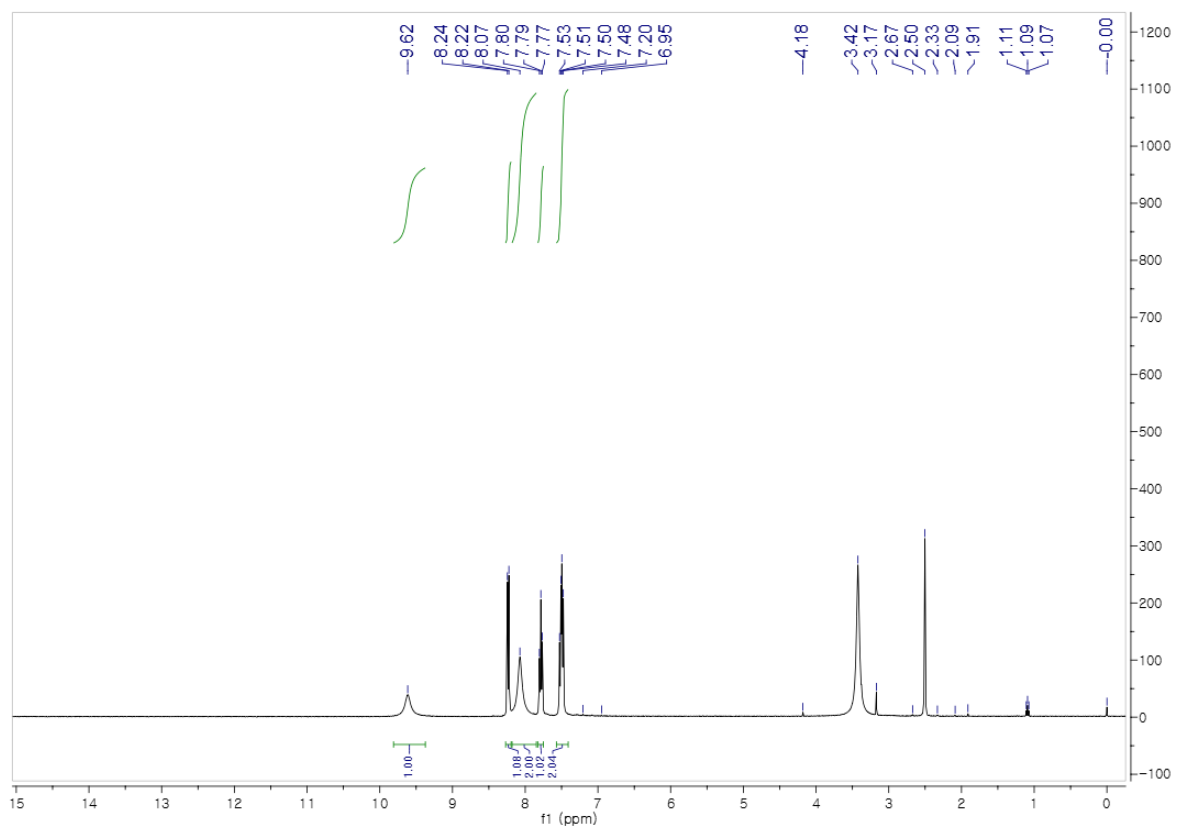

**Figure S1.**  $^1\text{H}$  NMR spectrum of receptor **1**.

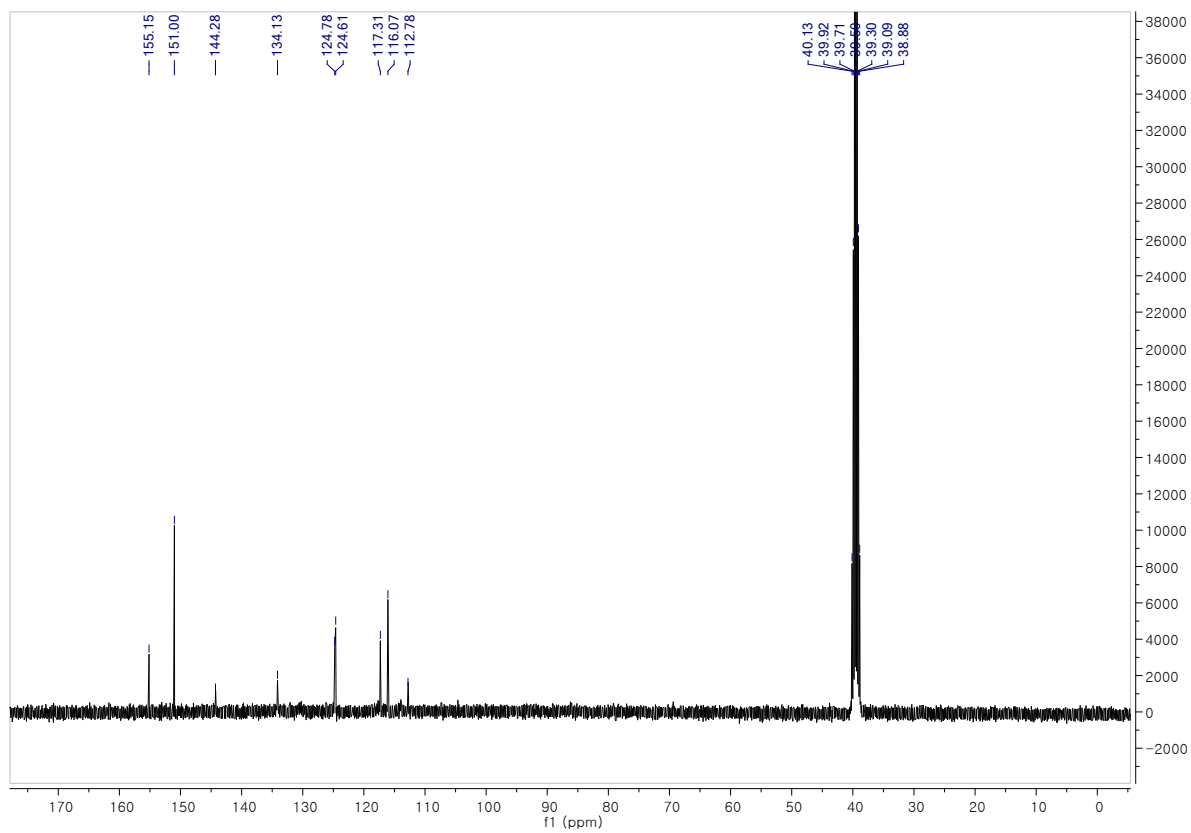

**Figure S2.**  $^{13}\text{C}$  NMR spectrum of receptor 1.

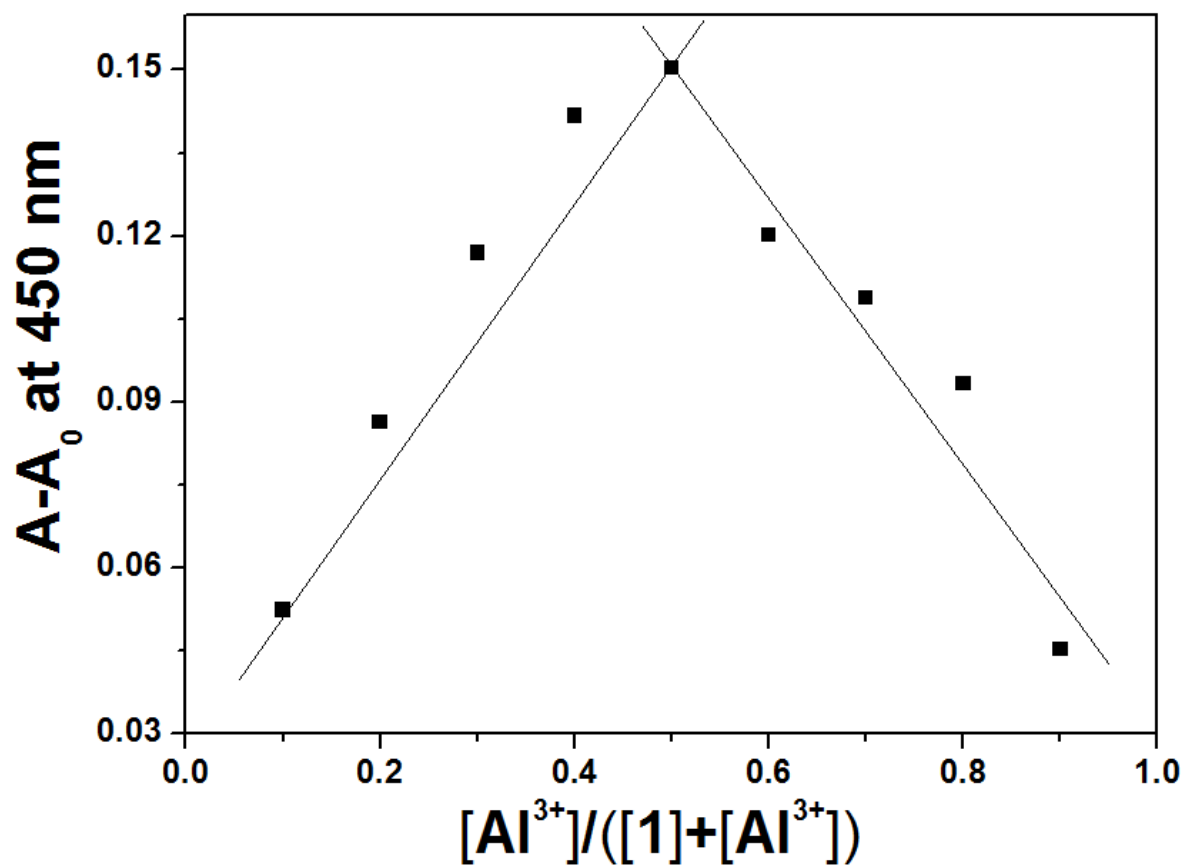

**Figure S3.** Job plot for the binding of **1** with Al<sup>3+</sup>. The change of absorbance at 450 nm was plotted as a function of the molar ratio  $[Al^{3+}]/([1] + [Al^{3+}])$ . The total concentration of aluminum ions with receptor **1** was  $3.0 \times 10^{-5}M$

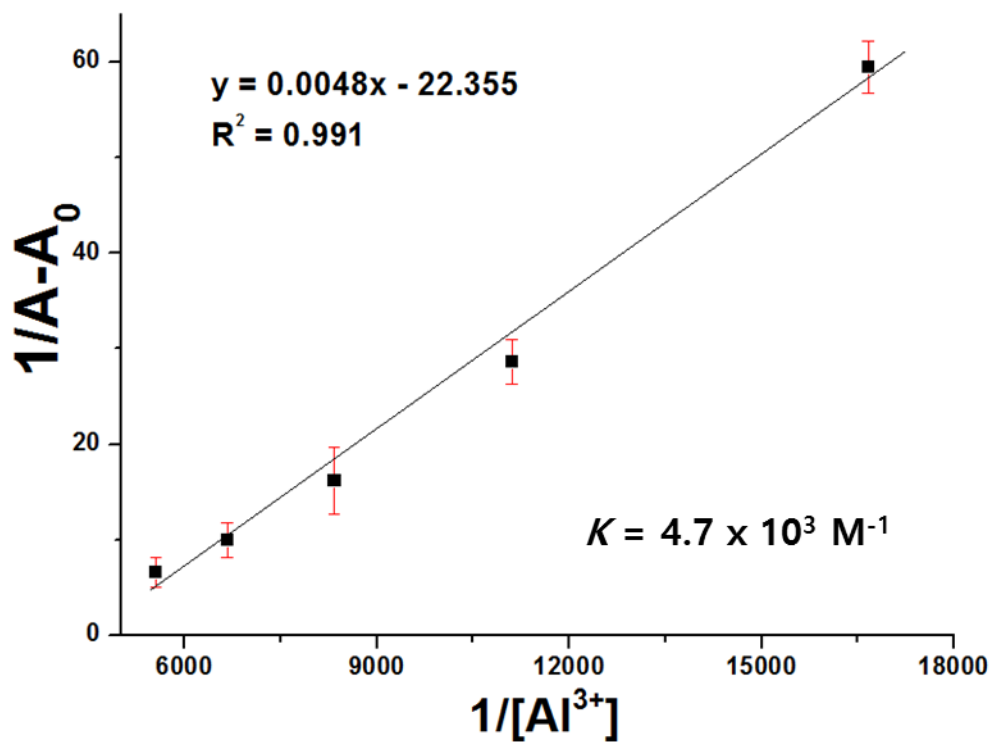

**Figure S4.** Benesi-Hildebrand equation plot (absorbance at 450 nm) of **1** (30  $\mu\text{M}$ ), assuming 1:1 stoichiometry for association between **1** and  $\text{Al}^{3+}$ .

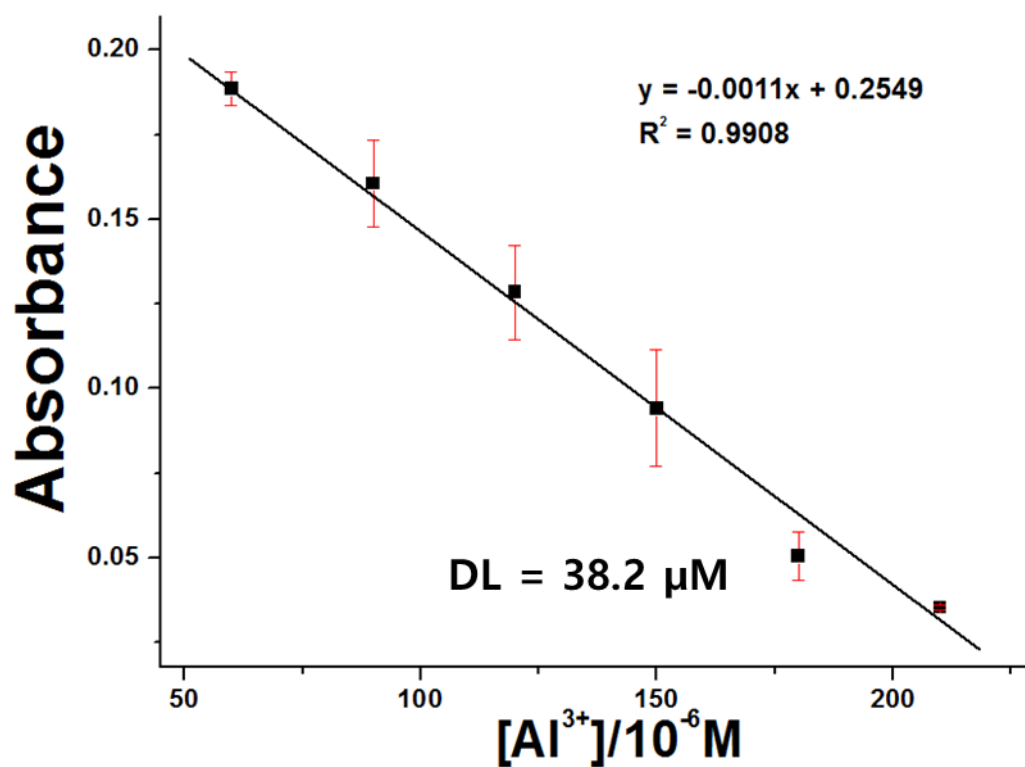

**Figure S5.** Determination of the detection limit based on change in the ratio (absorbance at 450 nm) of **1** (30  $\mu\text{M}$ ) with  $\text{Al}^{3+}$ .

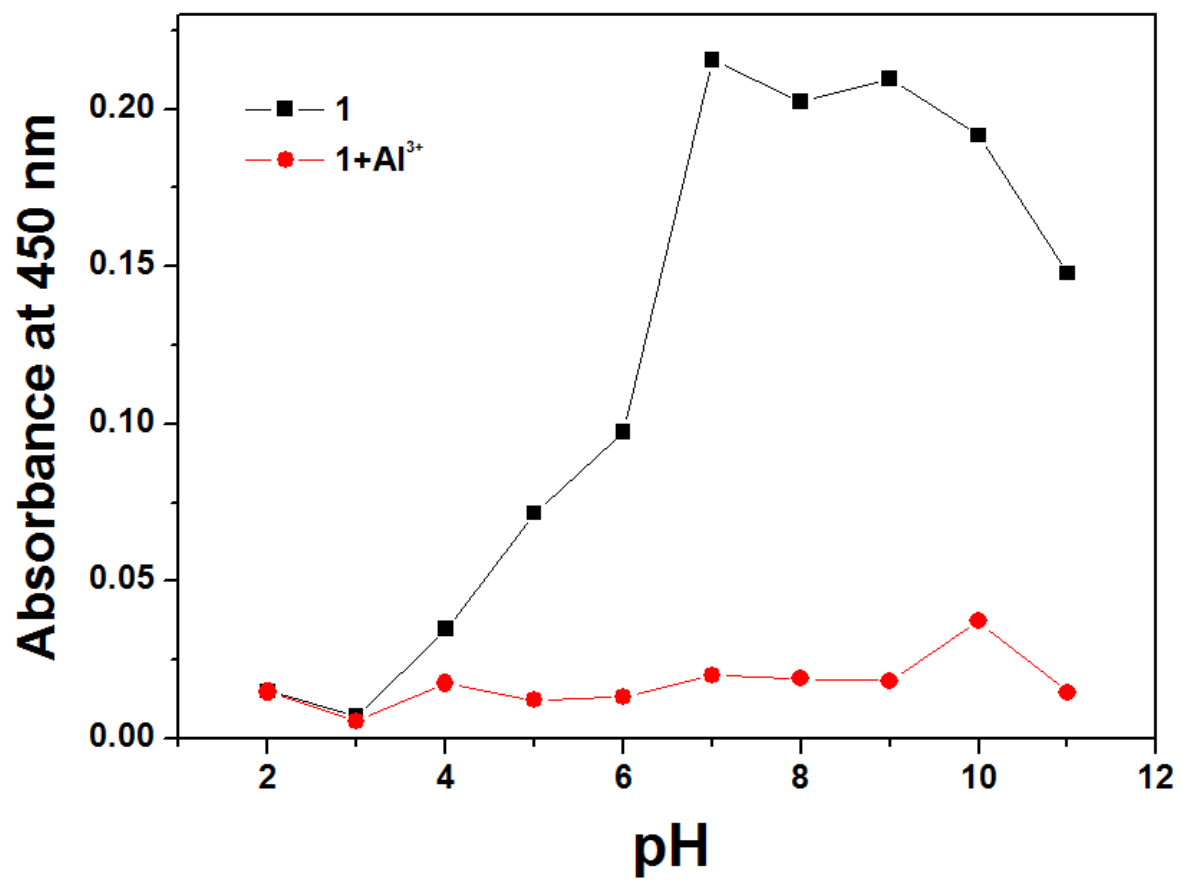

Figure S6. Absorbance (at 450 nm) of 1-Al<sup>3+</sup> complex at different pH values (2-11).

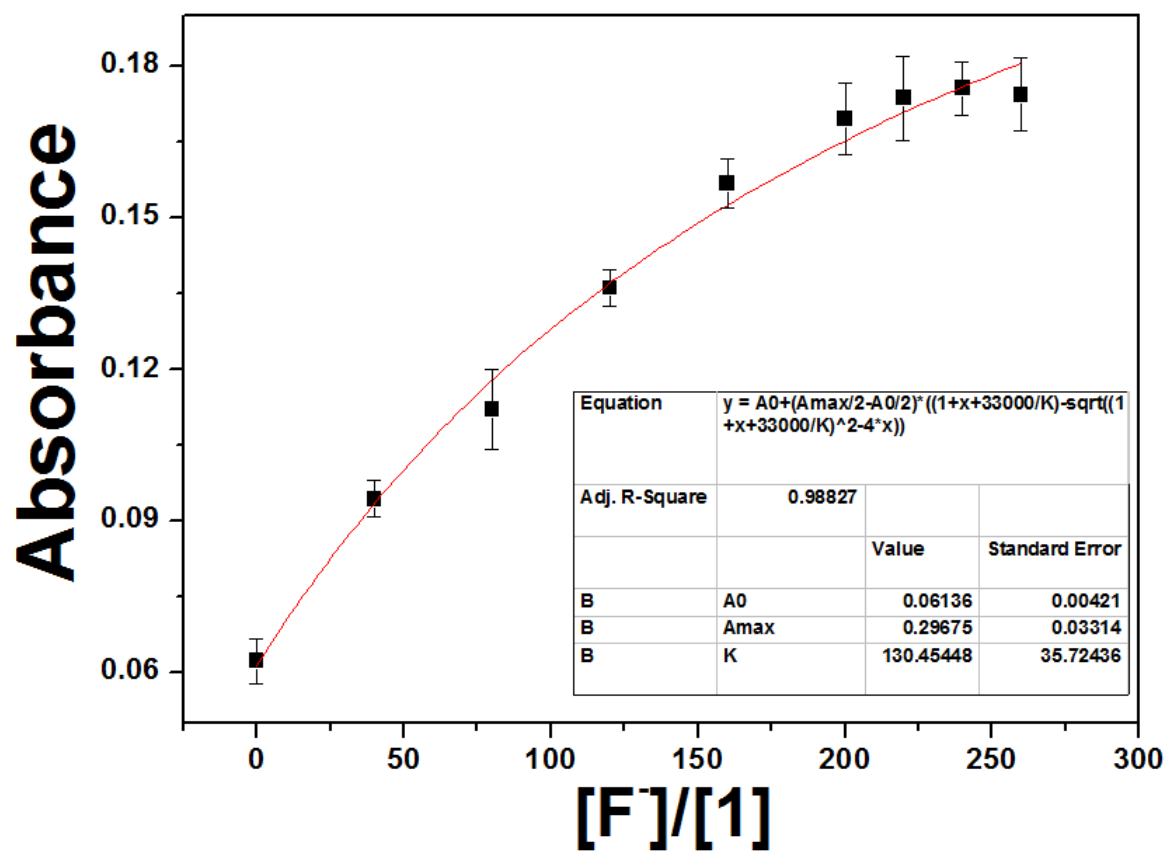

**Figure S7.** Determination of the association constant based on change in the ratio (absorbance at 520 nm) of **1** (30  $\mu$ M) with  $F^-$ . The red line is the nonlinear fitting curve obtained assuming a 1:1 association between **1** and  $F^-$ .



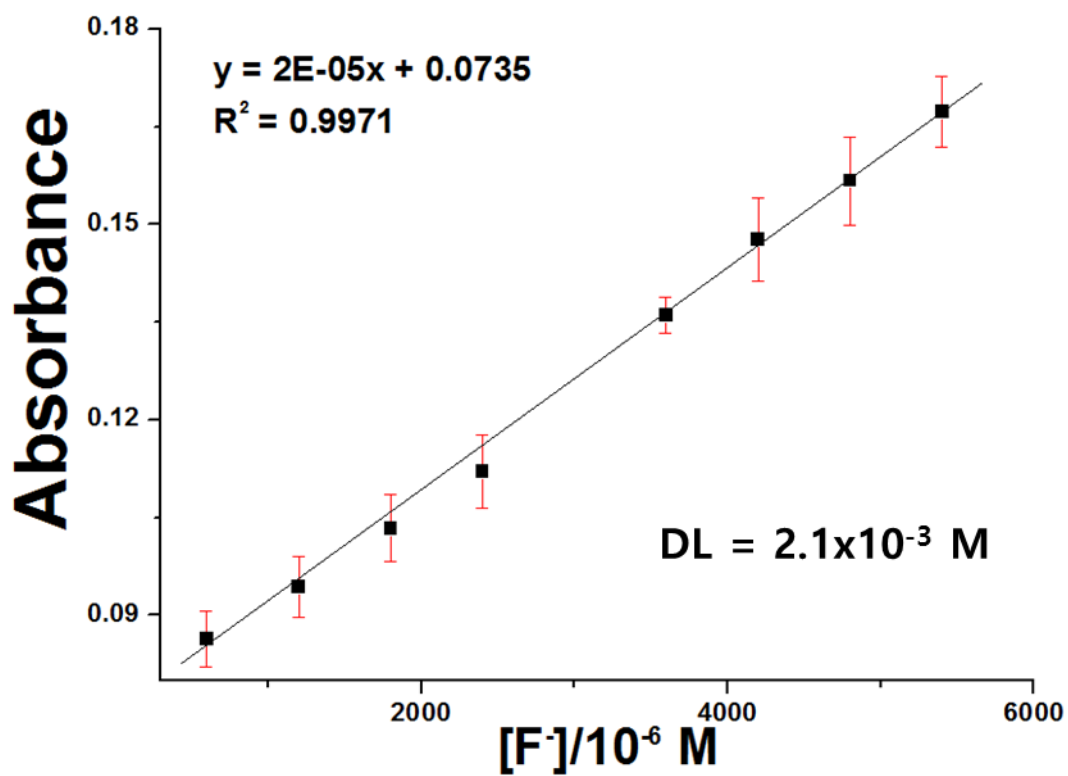

**Figure S8.** Determination of the detection limit based on change in the ratio (absorbance at 550 nm) of **1** (30  $\mu$ M) with F<sup>-</sup>.

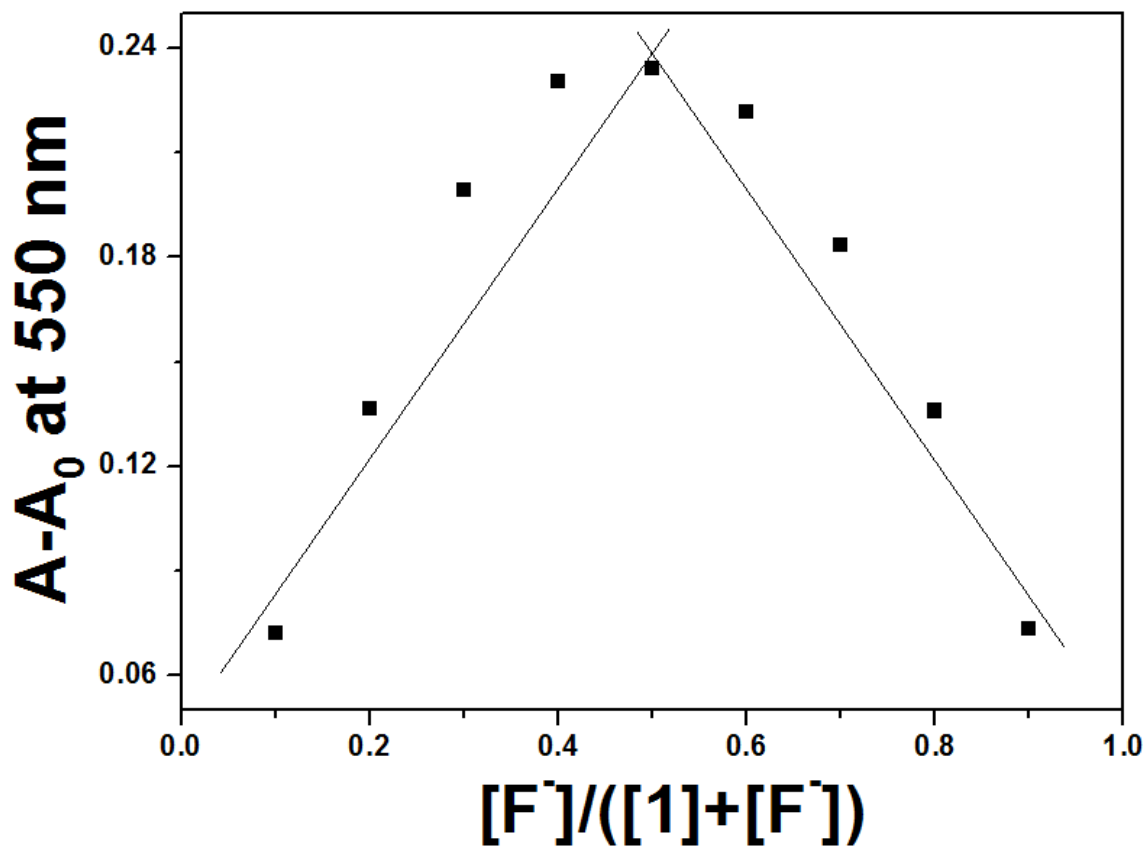

**Figure S9.** Job plot for the binding of **1** with  $F^-$ . The change of absorbance at 550 nm was plotted as a function of the molar ratio  $[F^-]/([1] + [F^-])$ . The total concentration of fluoride with receptor **1** was  $3.0 \times 10^{-5}$  M.

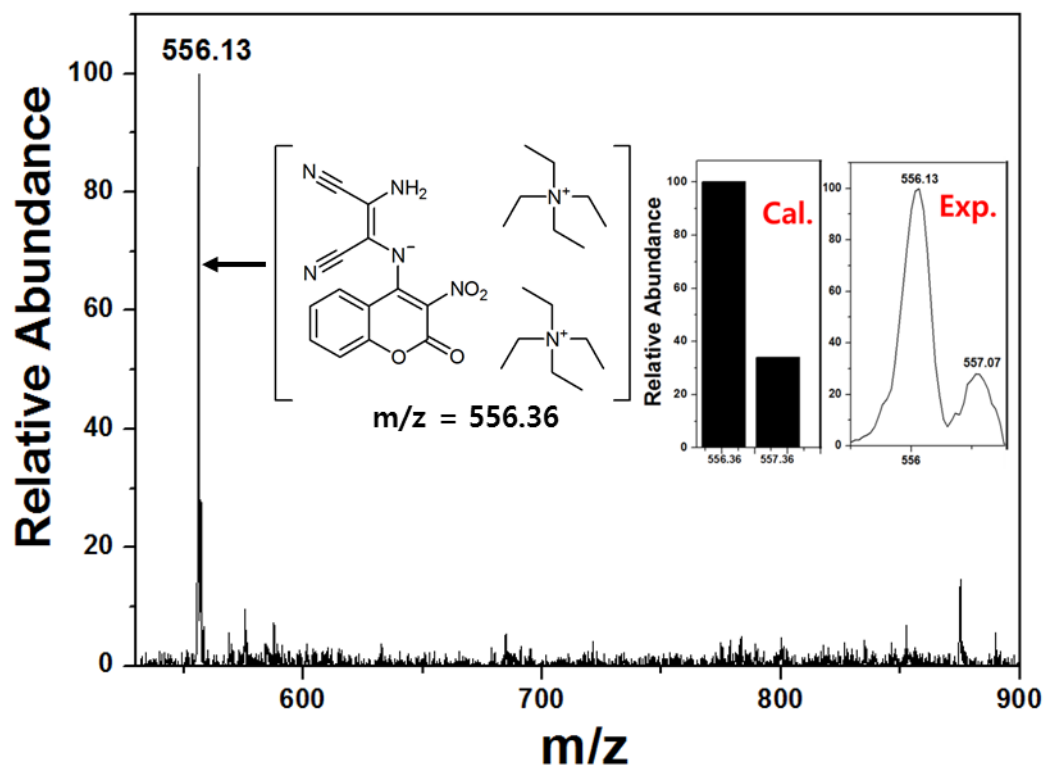

**Figure S10.** Positive-ion electrospray ionization mass spectrum of **1** (0.1 mM) upon addition of F<sup>-</sup> (1 equiv).
